# Supplementary material for: Serial measurements of circulating plasma cells before and after induction therapy have an independent prognostic impact in patients with multiple myeloma undergoing upfront autologous transplantation
Source: PubMed Central journal article supplement — Haematologica. 2017 May 4;102(8):1439–45. doi: 10.3324/haematol.2017.166629 (PMC5541877; doi:10.3324/haematol.2017.166629), 2017-08
Supplement: 2017.166629.CHAKRABORTY_SUPPL.pdf [file 2017.166629.CHAKRABORTY_SUPPL.pdf]

## Serial measurements of circulating plasma cells before and after induction therapy have an independent prognostic impact in patients with multiple myeloma undergoing upfront autologous transplantation

Rajshekhar Chakraborty,<sup>1,2</sup> Eli Muchtar,<sup>1</sup> Shaji K. Kumar,<sup>1</sup> Dragan Jevremovic,<sup>3</sup> Francis K. Buadi,<sup>1</sup> David Dingli,<sup>1</sup> Angela Dispenzieri,<sup>1</sup> Suzanne R. Hayman,<sup>1</sup> William J. Hogan,<sup>1</sup> Prashant Kapoor,<sup>1</sup> Martha Q. Lacy,<sup>1</sup> Nelson Leung<sup>1</sup> and Morie A. Gertz<sup>1</sup>

<sup>1</sup>Division of Hematology, Mayo Clinic, Rochester; <sup>2</sup>Hospitalist Services, Essentia Health-St. Joseph's Medical Center, Brainerd, and <sup>3</sup>Department of Laboratory Medicine and Pathology, Division of Hematopathology, Mayo Clinic, Rochester, MN, USA

©2017 Ferrata Storti Foundation. This is an open-access paper. doi:10.3324/haematol.2017.166629

Received: February 12, 2017.

Accepted: April 28, 2017.

Pre-published: May 4, 2017.

Correspondence: gertz.morie@mayo.edu

---

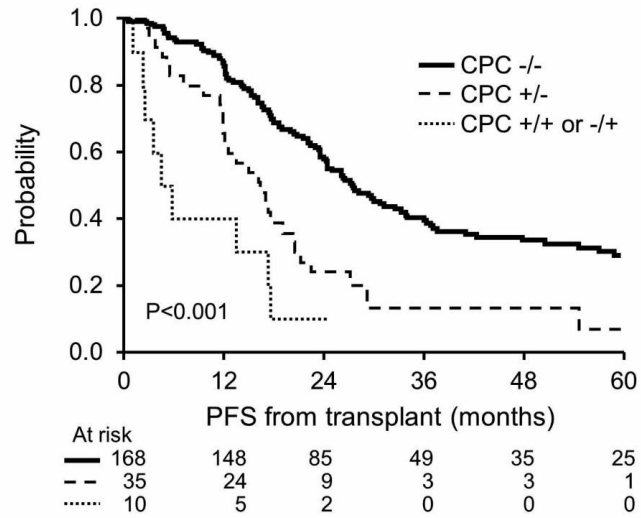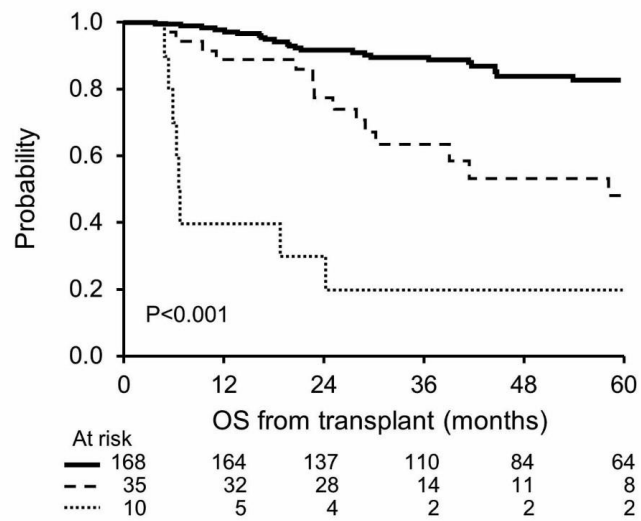

Supplementary appendix I. Kaplan-Meier curves for PFS and OS stratified by circulating plasma cells (CPCs) before and after (day#100) autologous stem cell transplantation.
