# Supplementary material for: Serial measurements of circulating plasma cells before and after induction therapy have an independent prognostic impact in patients with multiple myeloma undergoing upfront autologous transplantation
Source: PubMed Central journal article supplement — Haematologica. 2017 May 4;102(8):1439–45. doi: 10.3324/haematol.2017.166629 (PMC5541877; doi:10.3324/haematol.2017.166629), 2017-08
Supplement: 2017_166629-Disclosures_and_Contributions.pdf [file 2017_166629-Disclosures_and_Contributions.pdf]

Haematologica  
HAEMATOL/2017/166629  
Version 3

Serial measurements of circulating plasma cells before and after induction therapy has an independent prognostic impact in patients with multiple myeloma undergoing upfront autologous transplantation

Rajshekhar Chakraborty, Eli Muchtar, Shaji K. Kumar, Dragan Jevremovic, Francis K. Buadi, David Dingli, Angela Dispenzieri, Suzanne R. Hayman, William J. Hogan, Prashant Kapoor, Martha Q. Lacy, Nelson Leung, and Morie A. Gertz

Disclosures: None

Contributions: R.C. and M.A.G. designed the study, analyzed the data, wrote the first draft and approved the final version of the manuscript. E.M. designed the study, analyzed the data and approved the final version of the manuscript. M.A.G., S.K.K., D.J., F.K.B., D.D., A.D., S.R.H., W.J.H., P.K., M.Q.L. and N.L. performed patient management, revised the manuscript critically, participated in final data analysis and approved the final version of the manuscript.
